# Supplementary material
Source: Springer Nature journal article supplement (https://www.springermedizin.de/resource/supplementary/13063_2013_2108_MOESM3_ESM.docx/9621406)
Supplement: MOESM3 [file 9621406]

**Table 2: Summary of Fluoxetine Dosing Schedule for Participants < 40 Kg**

| **Week of Trial** | **Dose (per day)** |
| --- | --- |
| 1 | 4 mg |
| 2 | ***8 mg*** |
| 3 | ***14 mg*** |
| 4 | ***20 mg*** |
| 5-16 | Maintain effective dose |
| 17-20 | Wean off medication (at weekly intervals) |
